# Supplementary material
Source: HighWire-hosted journal article supplement (https://bmjopen.bmj.com/content/10/8/e040286)
Supplement: inline-supplementary-material-1 [file inline-supplementary-material-1.pdf]

## Supplementary material

Table S1. Characteristics of those with and without complete follow up data at five years.

|                                                                       | Complete HRQoL data (n=1008) | Incomplete HRQoL data (n=486) |
|-----------------------------------------------------------------------|------------------------------|-------------------------------|
| Age (mean(SD))                                                        | 70.6 (8.6)                   | 74.7 (9.0)                    |
| Sex (n(%) male)                                                       | 387 (38)                     | 160 (33)                      |
| Index of multiple deprivation (IMD) (n (%) in most deprived quintile) | 82 (8)                       | 49 (10)                       |
| Comorbidities (n (%) with three or more)                              | 344 (34)                     | 206 (42)                      |
| Functional impairment (KPS $\leq 70$ )                                | 234 (23)                     | 2 (0.4%)                      |

Table S2. Associations between patient-reported EQ-5D-5L quality of life domains and clinician-assessed functional status.

| Patient-reported EQ-5D-5L quality of life domain |                                        | No clinician-assessed functional impairment (KPS score >70) |       | Clinician-assessed functional impairment (KPS score $\leq 70$ ) |       | Total RRID cohort |       | p**    |
|--------------------------------------------------|----------------------------------------|-------------------------------------------------------------|-------|-----------------------------------------------------------------|-------|-------------------|-------|--------|
|                                                  |                                        | n                                                           | %*    | n                                                               | %*    | n                 | %*    |        |
| Mobility                                         | 1 (no problems in walking about)       | 416                                                         | 53.8  | 10                                                              | 4.3   | 426               | 42.3  | <0.001 |
|                                                  | 2 – 5 (some problems)                  | 358                                                         | 46.2  | 224                                                             | 95.7  | 582               | 57.7  |        |
| Self care                                        | 1 (no problems washing or dressing)    | 726                                                         | 93.8  | 116                                                             | 49.6  | 842               | 83.5  | <0.001 |
|                                                  | 2 – 5 (some problems)                  | 48                                                          | 6.2   | 118                                                             | 50.4  | 166               | 16.5  |        |
| Usual activities                                 | 1 (no problems doing usual activities) | 508                                                         | 65.6  | 34                                                              | 14.5  | 542               | 53.8  | <0.001 |
|                                                  | 2 – 5 (some problems)                  | 266                                                         | 34.4  | 200                                                             | 85.5  | 466               | 46.2  |        |
| Pain/ discomfort                                 | 1 (no pain or discomfort)              | 270                                                         | 34.9  | 26                                                              | 11.1  | 296               | 29.4  | <0.001 |
|                                                  | 2 – 5 (some pain or discomfort)        | 504                                                         | 65.1  | 208                                                             | 88.9  | 712               | 70.6  |        |
| Anxiety/ depression                              | 1 (not anxious or depressed)           | 576                                                         | 74.4  | 113                                                             | 48.3  | 689               | 68.4  | <0.001 |
|                                                  | 2 – 5 (some anxiety or depression)     | 198                                                         | 25.6  | 121                                                             | 51.7  | 319               | 31.6  |        |
| EQ-5D-3L index score (converted from EQ-5D-5L)   | > median for age and sex               | 351                                                         | 45.4  | 27                                                              | 11.5  | 378               | 37.5  | <0.001 |
|                                                  | $\leq$ median for age and sex          | 423                                                         | 54.7  | 207                                                             | 88.5  | 630               | 62.5  |        |
| Total                                            |                                        | 774                                                         | 100.0 | 234                                                             | 100.0 | 1008              | 100.0 |        |

\* Column percentages are shown.\*\* Chi-square test was performed. Abbreviations: KPS= Karnofsky Performance Status, RRID= Renal Risk in Derby

**Tables S3 to S6. Logistic regression models examining associations between lower quality of life (EQ-5D-5L domains of usual activities, self-care, pain/discomfort and anxiety/depression categorised as ‘no problems’ vs. ‘any problems’) and patient characteristics. N=1008 in univariable models unless otherwise stated, N=1005 for final multivariable logistic regression models**

### S3. USUAL ACTIVITIES

|                                                                                                                   |                                              | Univariable          |         | Multivariable*      |         |
|-------------------------------------------------------------------------------------------------------------------|----------------------------------------------|----------------------|---------|---------------------|---------|
|                                                                                                                   |                                              | OR (95% CI)          | p       | OR (95% CI)         | p       |
| <b>Age (years)</b>                                                                                                |                                              | 1.03 (1.02 – 1.05)   | <0.001  | 1.02 (1.00 – 1.04)  | 0.056   |
| <b>Female sex (vs. male)</b>                                                                                      |                                              | 1.05 (0.81 – 1.36)   | 0.71    | -                   | -       |
| <b>Index of multiple deprivation (IMD quintile relative to England) (vs. quintile 5: least deprived) [N=1006]</b> | Quintile 1 (most deprived)                   | 1.45 (0.87 – 2.40)   | 0.009#  | 0.83 (0.46 – 1.52)  | 0.076#  |
|                                                                                                                   | Quintile 2                                   | 1.93 (1.34 – 2.78)   |         | 1.64 (1.08 – 2.50)  |         |
|                                                                                                                   | Quintile 3                                   | 1.43 (0.97 – 2.12)   |         | 1.37 (0.87 – 2.15)  |         |
|                                                                                                                   | Quintile 4                                   | 1.25 (0.87 – 1.78)   |         | 1.12 (0.74 – 1.69)  |         |
| <b>Number of comorbidities (vs. no comorbidities)</b>                                                             | One                                          | 1.50 (0.77 – 2.91)   | <0.001# | 1.41 (0.68 – 2.90)  | <0.001# |
|                                                                                                                   | Two                                          | 2.56 (1.32 – 4.97)   |         | 1.82 (0.88 – 3.78)  |         |
|                                                                                                                   | Three or more                                | 6.34 (3.28 – 12.25)  |         | 4.20 (2.02 – 8.74)  |         |
| <b>Functional status (KPS score) (vs. KPS &gt;70)</b>                                                             | Functional impairment (KPS ≤70)              | 11.23 (7.59 – 16.64) | <0.001  | 8.27 (5.43 – 12.58) | <0.001  |
| <b>eGFR (ml/min/1.73m<sup>2</sup>) [N=1007]</b>                                                                   |                                              | 0.99 (0.98 – 1.00)   | 0.013   | 1.01 (1.00 – 1.02)  | 0.139   |
| <b>uACR (KDIGO categories) (vs. category A1, &lt;3mg/mmol) [N=1007]</b>                                           | A2 (3-29 mg/mmol)                            | 1.24 (0.92 - 1.68)   | 0.090#  | 0.92 (0.63 – 1.34)  | 0.767#  |
|                                                                                                                   | A3 (≥30mg/mmol)                              | 1.72 (0.97 – 3.09)   |         | 1.19 (0.59 – 2.43)  |         |
| <b>Educational attainment (vs. first or higher degree or NVQ 4-5) [N=1007]</b>                                    | No formal qualifications                     | 1.88 (1.35 – 2.62)   | <0.001# | 1.22 (0.82 – 1.82)  | 0.549#  |
|                                                                                                                   | GCSE, A level or NVQ 1-3                     | 1.30 (0.90 – 1.87)   |         | 1.24 (0.82 – 1.89)  |         |
| <b>BMI (vs. &lt;25 kg/m<sup>2</sup>)</b>                                                                          | Overweight (BMI 25-29.99 kg/m <sup>2</sup> ) | 1.54 (1.08 – 2.21)   | <0.001# | 1.38 (0.92 – 2.06)  | 0.019#  |
|                                                                                                                   | Obese (BMI ≥30 kg/m <sup>2</sup> )           | 2.81 (1.96 – 4.03)   |         | 1.82 (1.19 – 2.76)  |         |
| <b>Smoking status (vs. never smoked)</b>                                                                          | Current smoker                               | 0.85 (0.46 – 1.60)   | 0.421#  | -                   | -       |
|                                                                                                                   | Ex-smoker                                    | 1.15 (0.89 – 1.49)   |         | -                   |         |

\*Adjusted for age, deprivation level, number of comorbidities, functional status, eGFR at five-year follow-up, uACR at five-year follow-up, educational attainment, and BMI. #p value for trend. Abbreviations: OR= Odds Ratio, CI= Confidence Interval, KPS= Karnofsky Performance Status, eGFR= estimated Glomerular Filtration Rate, uACR= Urinary Albumin to Creatinine Ratio, KDIGO= Kidney Disease Improving Global Outcomes,

GCSE= General Certificate of Secondary Education, A level= Advanced level, NVQ= National Vocational Qualifications, BMI= Body Mass Index, IMD= Index of Multiple Deprivation.

#### S4. SELF CARE

|                                                                                                                   |                                              | Univariable           |                     | Multivariable*       |                    |
|-------------------------------------------------------------------------------------------------------------------|----------------------------------------------|-----------------------|---------------------|----------------------|--------------------|
|                                                                                                                   |                                              | OR (95% CI)           | p                   | OR (95% CI)          | p                  |
| <b>Age (years)</b>                                                                                                |                                              | 1.01 (0.99 – 1.03)    | 0.472               | -                    | -                  |
| <b>Female sex (vs. male)</b>                                                                                      |                                              | 0.91 (0.64 – 1.27)    | 0.568               | -                    | -                  |
| <b>Index of multiple deprivation (IMD quintile relative to England) (vs. quintile 5: least deprived) [N=1006]</b> | Quintile 1 (most deprived)                   | 2.27 (1.19 – 4.34)    | 0.041 <sup>#</sup>  | 1.12 (0.51 – 2.42)   | 0.895 <sup>#</sup> |
|                                                                                                                   | Quintile 2                                   | 1.90 (1.15 – 3.15)    |                     | 1.20 (0.67 – 2.19)   |                    |
|                                                                                                                   | Quintile 3                                   | 1.64 (0.95 – 2.84)    |                     | 1.31 (0.68 – 2.51)   |                    |
|                                                                                                                   | Quintile 4                                   | 1.26 (0.75 – 2.13)    |                     | 0.99 (0.54 – 1.85)   |                    |
| <b>Number of comorbidities (vs. no comorbidities)</b>                                                             | One                                          | 1.43 (0.41 – 4.92)    | <0.001 <sup>#</sup> | 1.27 (0.34 – 4.84)   | 0.050 <sup>#</sup> |
|                                                                                                                   | Two                                          | 3.37 (1.01 – 11.21)   |                     | 1.89 (0.51 – 6.97)   |                    |
|                                                                                                                   | Three or more                                | 6.45 (1.97 – 21.15)   |                     | 2.64 (0.72 – 9.67)   |                    |
| <b>Functional status (KPS score) (vs. KPS &gt;70)</b>                                                             | Functional impairment (KPS ≤70)              | 15.39 (10.43 – 22.69) | <0.001              | 13.08 (8.46 – 20.22) | <0.001             |
| <b>eGFR (ml/min/1.73m<sup>2</sup>) [N=1007]</b>                                                                   |                                              | 0.99 (0.98 – 1.00)    | 0.055               | 1.01 (0.99 – 1.21)   | 0.154              |
| <b>uACR (KDIGO categories) (vs. category A1, &lt;3mg/mmol) [N=1007]</b>                                           | A2 (3-29 mg/mmol)                            | 1.37 (0.93 - 2.03)    | 0.223 <sup>#</sup>  | -                    | -                  |
|                                                                                                                   | A3 (≥30mg/mmol)                              | 1.39 (0.67 – 2.86)    |                     | -                    |                    |
| <b>Educational attainment (vs. first or higher degree or NVQ 4-5) [N=1007]</b>                                    | No formal qualifications                     | 1.91 (1.18 – 3.08)    | 0.014 <sup>#</sup>  | 1.11 (0.63 – 1.97)   | 0.669 <sup>#</sup> |
|                                                                                                                   | GCSE, A level or NVQ 1-3                     | 1.31 (0.76 – 2.23)    |                     | 1.32 (0.69 – 2.50)   |                    |
| <b>BMI (vs. &lt;25 kg/m<sup>2</sup>)</b>                                                                          | Overweight (BMI 25-29.99 kg/m <sup>2</sup> ) | 1.20 (0.68 – 2.13)    | <0.001 <sup>#</sup> | 0.95 (0.49 – 1.82)   | 0.003 <sup>#</sup> |
|                                                                                                                   | Obese (BMI ≥30 kg/m <sup>2</sup> )           | 3.47 (2.03 – 5.92)    |                     | 1.98 (1.06 – 3.71)   |                    |
| <b>Smoking status (vs. never smoked)</b>                                                                          | Current smoker                               | 2.17 (1.05 – 4.51)    | 0.018 <sup>#</sup>  | 2.53 (1.00 – 6.40)   | 0.006 <sup>#</sup> |
|                                                                                                                   | Ex-smoker                                    | 1.53 (1.08 – 2.16)    |                     | 1.89 (1.24 – 2.88)   |                    |

\* Adjusted for deprivation level, number of comorbidities, functional status, eGFR at five-year follow-up, educational attainment, BMI and smoking. <sup>#</sup>p value for trend. Abbreviations: OR= Odds Ratio, CI= Confidence Interval, KPS= Karnofsky Performance Status, eGFR= estimated Glomerular Filtration Rate, uACR= Urinary Albumin to Creatinine Ratio, KDIGO= Kidney Disease Improving Global Outcomes, GCSE= General Certificate of Secondary Education, A level= Advanced level, NVQ= National Vocational Qualifications, BMI= Body Mass Index, IMD= Index of Multiple Deprivation.

## S5. PAIN / DISCOMFORT

|                                                                                                                   |                                              | Univariable        |                     | Multivariable*     |                     |
|-------------------------------------------------------------------------------------------------------------------|----------------------------------------------|--------------------|---------------------|--------------------|---------------------|
|                                                                                                                   |                                              | OR (95% CI)        | p                   | OR (95% CI)        | p                   |
| <b>Age (years)</b>                                                                                                |                                              | 1.02 (1.00 – 1.03) | 0.026               | 1.01 (0.99 – 1.02) | 0.550               |
| <b>Female sex (vs. male)</b>                                                                                      |                                              | 1.23 (0.93 – 1.63) | 0.141               | -                  | -                   |
| <b>Index of multiple deprivation (IMD quintile relative to England) (vs. quintile 5: least deprived) [N=1006]</b> | Quintile 1 (most deprived)                   | 2.42 (1.30 – 4.50) | 0.046 <sup>#</sup>  | 1.87 (0.97 – 3.60) | 0.381 <sup>#</sup>  |
|                                                                                                                   | Quintile 2                                   | 1.52 (1.03 – 2.24) |                     | 1.33 (0.88 – 2.03) |                     |
|                                                                                                                   | Quintile 3                                   | 1.27 (0.84 – 1.92) |                     | 1.26 (0.81 – 1.95) |                     |
|                                                                                                                   | Quintile 4                                   | 1.25 (0.86 – 1.82) |                     | 1.24 (0.83 – 1.84) |                     |
| <b>Number of comorbidities (vs. no comorbidities)</b>                                                             | One                                          | 1.62 (0.91 – 2.86) | <0.001 <sup>#</sup> | 1.49 (0.82 – 2.71) | <0.001 <sup>#</sup> |
|                                                                                                                   | Two                                          | 2.95 (1.65 – 5.29) |                     | 2.27 (1.22 – 4.20) |                     |
|                                                                                                                   | Three or more                                | 4.70 (2.60 – 8.48) |                     | 3.06 (1.63 – 5.73) |                     |
| <b>Functional status (KPS score) (vs. KPS &gt;70)</b>                                                             | Functional impairment (KPS ≤70)              | 4.29 (2.78 – 6.61) | <0.001              | 2.94 (1.86 – 4.67) | <0.001              |
| <b>eGFR (ml/min/1.73m<sup>2</sup>) [N=1007]</b>                                                                   |                                              | 0.99 (0.98 – 1.00) | 0.150               | -                  | -                   |
| <b>uACR (KDIGO categories) (vs. category A1, &lt;3mg/mmol) [N=1007]</b>                                           | A2 (3-29 mg/mmol)                            | 0.87 (0.62 - 1.20) | 0.670 <sup>#</sup>  | -                  | -                   |
|                                                                                                                   | A3 (≥30mg/mmol)                              | 1.04 (0.55 – 1.96) |                     | -                  |                     |
| <b>Educational attainment (vs. first or higher degree or NVQ 4-5) [N=1007]</b>                                    | No formal qualifications                     | 1.67 (1.19 – 2.35) | 0.007 <sup>#</sup>  | 1.23 (0.84 – 1.97) | 0.075 <sup>#</sup>  |
|                                                                                                                   | GCSE, A level or NVQ 1-3                     | 1.65 (1.13 – 2.41) |                     | 1.59 (1.06 – 2.38) |                     |
| <b>BMI (vs. &lt;25 kg/m<sup>2</sup>)</b>                                                                          | Overweight (BMI 25-29.99 kg/m <sup>2</sup> ) | 1.63 (1.15 – 2.30) | <0.001 <sup>#</sup> | 1.47 (1.02 – 2.12) | <0.001 <sup>#</sup> |
|                                                                                                                   | Obese (BMI ≥30 kg/m <sup>2</sup> )           | 3.26 (2.23 – 4.76) |                     | 2.37 (1.58 – 3.55) |                     |
| <b>Smoking status (vs. never smoked)</b>                                                                          | Current smoker                               | 1.12 (0.56 – 2.24) | 0.945 <sup>#</sup>  | -                  | -                   |
|                                                                                                                   | Ex-smoker                                    | 1.02 (0.77 – 1.34) |                     | -                  |                     |

Adjusted for age, deprivation level, number of comorbidities, functional status, educational attainment, and BMI. <sup>#</sup>p value for trend. Abbreviations: OR= Odds Ratio, CI= Confidence Interval, KPS= Karnofsky Performance Status, eGFR= estimated Glomerular Filtration Rate, uACR= Urinary Albumin to Creatinine Ratio, KDIGO= Kidney Disease Improving Global Outcomes, GCSE= General Certificate of Secondary Education, A level= Advanced level, NVQ= National Vocational Qualifications, BMI= Body Mass Index, IMD= Index of Multiple Deprivation.

## S6. ANXIETY / DEPRESSION

|                                                                                                                   |                                              | Univariable        |                    | Multivariable*     |                    |
|-------------------------------------------------------------------------------------------------------------------|----------------------------------------------|--------------------|--------------------|--------------------|--------------------|
|                                                                                                                   |                                              | OR (95% CI)        | p                  | OR (95% CI)        | p                  |
| <b>Age (years)</b>                                                                                                |                                              | 1.00 (0.98 – 1.01) | 0.942              | -                  | -                  |
| <b>Female sex (vs. male)</b>                                                                                      |                                              | 1.63 (1.23 – 2.16) | 0.001              | 1.60 (1.18 – 2.16) | 0.002              |
| <b>Index of multiple deprivation (IMD quintile relative to England) (vs. quintile 5: least deprived) [N=1006]</b> | Quintile 1 (most deprived)                   | 0.89 (0.51 – 1.54) | 0.856 <sup>#</sup> | -                  | -                  |
|                                                                                                                   | Quintile 2                                   | 0.94 (0.64 – 1.38) |                    | -                  |                    |
|                                                                                                                   | Quintile 3                                   | 1.14 (0.76 – 1.72) |                    | -                  |                    |
|                                                                                                                   | Quintile 4                                   | 0.95 (0.65 – 1.38) |                    | -                  |                    |
| <b>Number of comorbidities (vs. no comorbidities)</b>                                                             | One                                          | 0.80 (0.43 – 1.51) | 0.005 <sup>#</sup> | 0.94 (0.49 – 1.81) | 0.269 <sup>#</sup> |
|                                                                                                                   | Two                                          | 1.25 (0.67 – 2.34) |                    | 1.29 (0.67 – 2.47) |                    |
|                                                                                                                   | Three or more                                | 1.48 (0.80 – 2.75) |                    | 1.30 (0.68 – 2.49) |                    |
| <b>Functional status (KPS score) (vs. KPS &gt;70)</b>                                                             | Functional impairment (KPS ≤70)              | 3.12 (2.30 – 4.22) | <0.001             | 3.08 (2.23 – 4.27) | <0.001             |
| <b>eGFR (ml/min/1.73m<sup>2</sup>) [N=1007]</b>                                                                   |                                              | 1.00 (0.99 – 1.01) | 0.998              | -                  | -                  |
| <b>uACR (KDIGO categories) (vs. category A1, &lt;3mg/mmol) [N=1007]</b>                                           | A2 (3-29 mg/mmol)                            | 1.00 (0.72 - 1.38) | 0.851 <sup>#</sup> | -                  | -                  |
|                                                                                                                   | A3 (≥30mg/mmol)                              | 0.83 (0.44 – 1.57) |                    | -                  |                    |
| <b>Educational attainment (vs. first or higher degree or NVQ 4-5) [N=1007]</b>                                    | No formal qualifications                     | 1.51 (1.04 – 2.18) | 0.009 <sup>#</sup> | 1.05 (0.71 – 1.56) | 0.009 <sup>#</sup> |
|                                                                                                                   | GCSE, A level or NVQ 1-3                     | 1.86 (1.25 – 2.77) |                    | 1.67 (1.10 – 2.52) |                    |
| <b>BMI (vs. &lt;25 kg/m<sup>2</sup>)</b>                                                                          | Overweight (BMI 25-29.99 kg/m <sup>2</sup> ) | 0.94 (0.65 – 1.36) | 0.133 <sup>#</sup> | -                  | -                  |
|                                                                                                                   | Obese (BMI ≥30 kg/m <sup>2</sup> )           | 1.26 (0.87 – 1.82) |                    | -                  |                    |
| <b>Smoking status (vs. never smoked)</b>                                                                          | Current smoker                               | 1.00 (0.51 – 1.94) | 0.989 <sup>#</sup> | -                  | -                  |
|                                                                                                                   | Ex-smoker                                    | 0.98 (0.75 – 1.29) |                    | -                  |                    |

\* Adjusted for sex, number of comorbidities, and functional status. <sup>#</sup>p value for trend. Abbreviations: OR= Odds Ratio, CI= Confidence Interval, KPS= Karnofsky Performance Status, eGFR= estimated Glomerular Filtration Rate, uACR= Urinary Albumin to Creatinine Ratio, KDIGO= Kidney Disease Improving Global Outcomes, GCSE= General Certificate of Secondary Education, A level= Advanced level, NVQ= National Vocational Qualifications, BMI= Body Mass Index, IMD= Index of Multiple Deprivation.
